# Supplementary material for: Electrochemical quantification of sulfamethoxazole antibiotic in environmental water using zeolitic imidazolate framework (ZIF)-derived single-atom cobalt catalyst in nitrogen-doped carbon nanostructures
Source: Royal Society of Chemistry journal article supplement (doi:10.1039/d2sd00117a), 2022-01-01
Supplement: d2sd00117a1.pdf [file d2sd00117a1.pdf]

## Electronic Supplementary Information (ESI):

# **Electrochemical quantification of sulfamethoxazole antibiotic in environmental water using zeolitic imidazolate framework (ZIF)-derived single-atom cobalt catalyst in nitrogen-doped carbon nanostructures**

Qingyu Gu, Zhongxue Wang, Qianwen Ding, Huiling Li, Ping Wu,\* and Chenxin Cai\*

Jiangsu Key Laboratory of New Power Batteries, Jiangsu Collaborative Innovation Center of Biomedical Functional Materials, College of Chemistry and Materials Science, Nanjing Normal University, Nanjing 210023, P.R. China

\* Corresponding authors, E-mail: [wuping@njnu.edu.cn](mailto:wuping@njnu.edu.cn) (P.W.), [cxcai@njnu.edu.cn](mailto:cxcai@njnu.edu.cn) (C.C.).

## **Contents:**

### **1. Instruments for characterization**

### **2. HPLC analysis of CAP in water samples**

### **3. Figures**

**Fig. S1** XRD pattern of the Co/N-C.

**Fig. S2** CV responses of the SMX at different pH.

**Fig. S3** Electron transfer process of the SMX oxidation.

**Fig. S4** Raman spectra of Co/N-C (a) and N-C.

**Fig. S5** EIS of  $\text{Fe}(\text{CN})_6^{3-/4-}$  at the different electrodes.

**Fig. S6** CV of  $\text{Fe}(\text{CN})_6^{3-}$  at the different electrodes.

**Fig. S7** Simulated adsorption configurations of SMX.

**Fig. S8** TEM image of the Co/N-C SACs synthesized with Co:Zn ratio of 0.75:1.

## 1. Instruments for characterization

Scanning electron microscopy (SEM) images were recorded using a JSM-7600F field-emitting scanning electron microscope (JEOL, Japan). Transmission electron microscopy (TEM) images were recorded on a JEM-2100F TEM (JEOL, Japan) operating at an accelerating voltage of 200 kV. The sub-Ångström-resolution, aberration-corrected HAADF-STEM images were recorded on a JEOL JEM 2200FS STEM/TEM, equipped with a CEOS (Heidelberg, Ger) probe corrector, with a nominal image resolution of 0.07 nm. The surface characteristics of the synthesized materials were examined by X-ray photoelectron spectroscopy (XPS), which was measured with an ESCALAB 250 XPS spectrometer (VG Scientifics) using a monochromatic Al K $\alpha$  line at 1486.6 eV. Binding energies were calibrated with respect to the C 1s peak at 284.6 eV. Peak fit analysis was performed using the XPS PEAK program (version 4.0). Raman spectra were recorded on a Labram HR 800 microspectrometer (Jobin Yvon, France) with an excitation source of 532 nm. Typically, Raman spectra were acquired from an area of 1 mm  $\times$  1 mm on the substrate. The collection time of each Raman spectrum was 10 s. XRD patterns were recorded on a Rigaku/Max-3A X-ray diffractometer with Cu K $\alpha$  radiation ( $\lambda = 0.15418$  nm).

## 2. HPLC analysis of SMX in water samples

HPLC analysis was carried out with an HPLC system of Shimadzu's VP-ODS (Shimadzu Corporation, Japan) with a C18 column (150 mm  $\times$  4.6 mm  $\times$  5  $\mu$ m) with temperature of HPLC column at 27 °C. The mobile phase consisted of an aqueous phase (0.075 mol/L sodium acetate, 0.035 mol/L calcium chloride, and 0.025 mol/L sodium EDTA at pH 7.0) and an organic phase (methanol and acetonitrile under the volume ratio of 75:25). Gradient elution of 90:10 aqueous phase: organic phase to 50:50 aqueous phase: organic phase (0–30 min) then to 90:10 aqueous phase: organic phase (30–35 min) was used. The flow rate was adjusted at 0.8 mL/min. Quantitative measurements were carried out by selecting the appropriate detection wavelength to attain maximum sensitivity. Therefore, the quantification was performed through internal standardization at 311 nm.

### 3. Figures

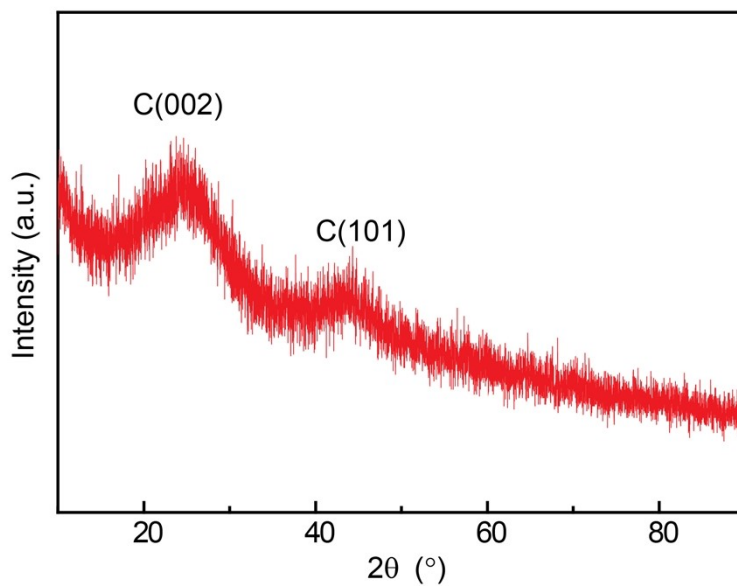

**Fig. S1** XRD pattern of the Co/N-C SACs.

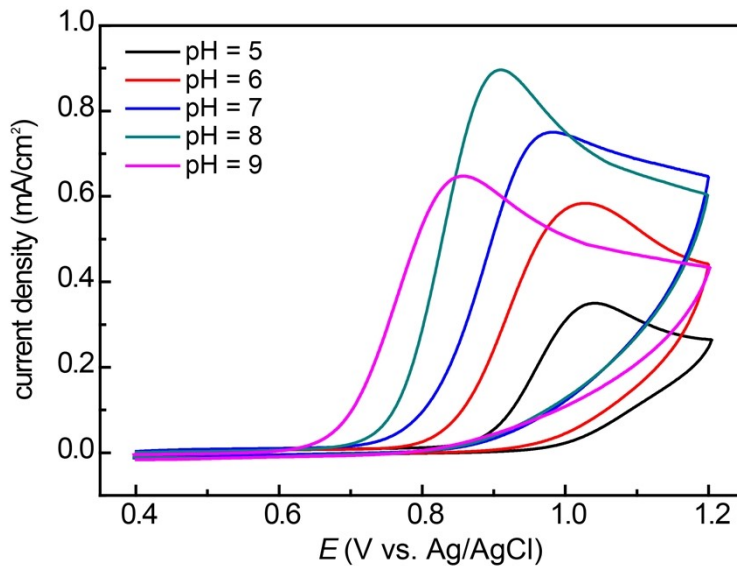

**Fig. S2** CV responses of the SMX ( 50 μM) at the Co/N-C/GC electrode in 0.1 M PBS at various pH values. The scanning rate is 50 mV/s.

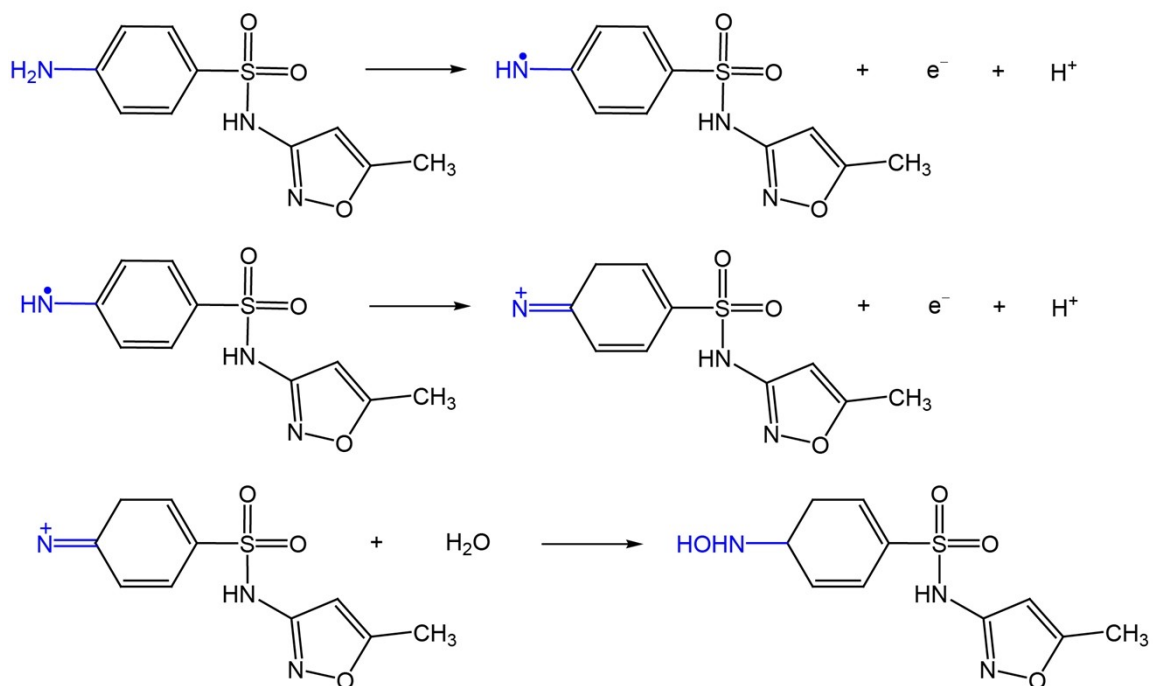

**Fig. S3** The electron transfer of the oxidation of the  $-NH_2$  group in SMX to  $-NHOH$  group over Co/N-C/GC electrode.

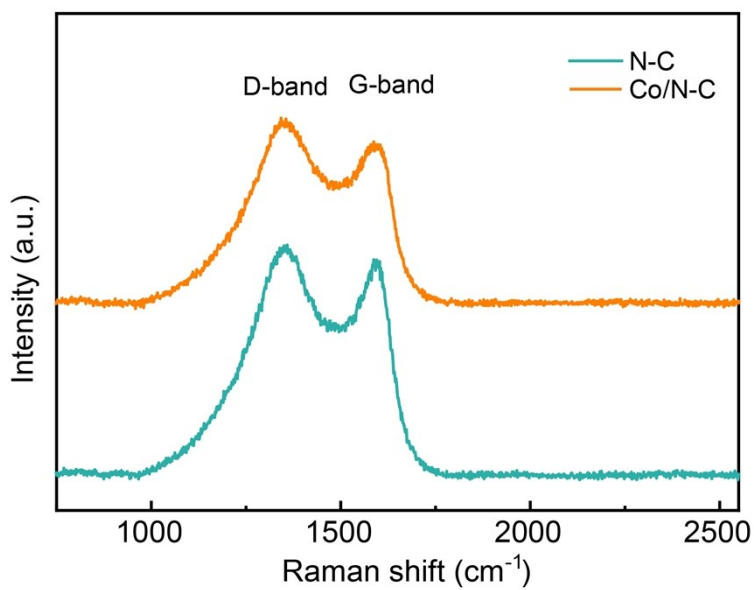

**Fig. S4** Raman spectra of Co/N-C and N-C.

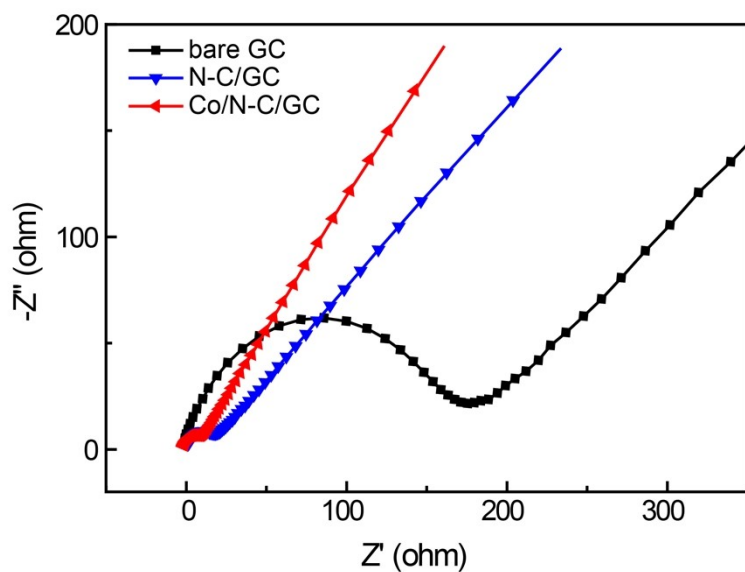

**Fig. S5** Nyquist plots of the bare GC, Co/N-C/GC, and N-C/GC electrodes in 0.1 M KCl solution containing 5 mM  $K_3Fe(CN)_6/K_4Fe(CN)_6$  (1:1) in the frequency range from 0.1 Hz to 100 kHz. Amplitude: 10 mV.

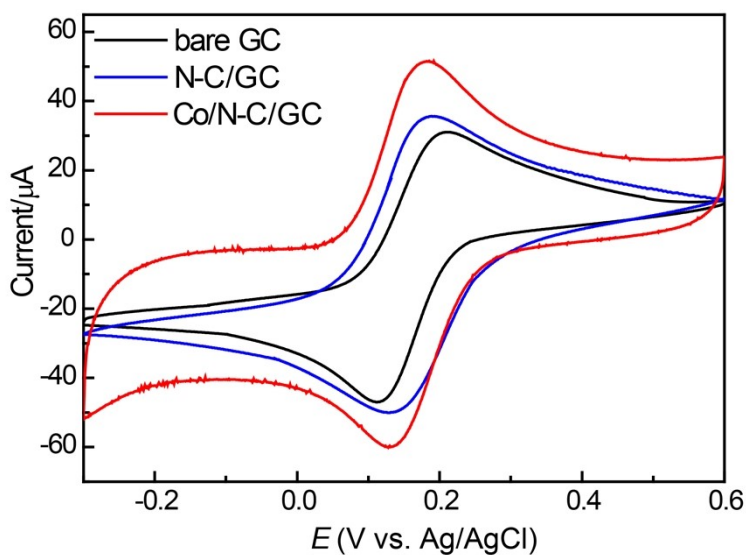

**Fig. S6** CV responses of the bare GC, Co/N-C/GC, and N-C/GC electrodes in 1 M KCl solution containing 1.0 mM  $K_3Fe(CN)_6$ . Scan rate: 100 mV/s.

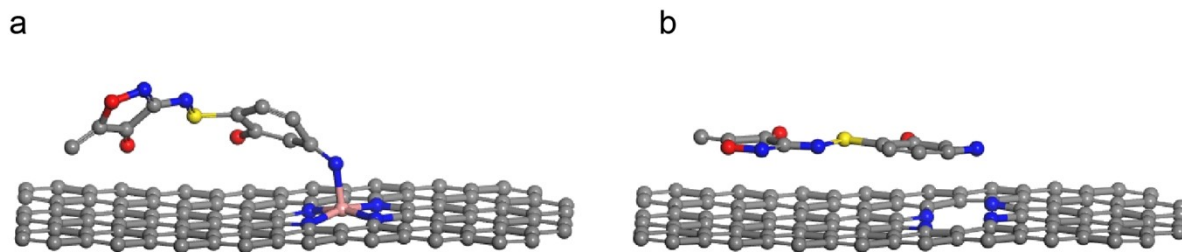

**Fig. S7** Optimized configurations of SMX adsorbed on Co/N-C (a), and N-C (b). Atomic color code: gray, carbon; red, oxygen; blue, nitrogen; and yellow, sulfur.

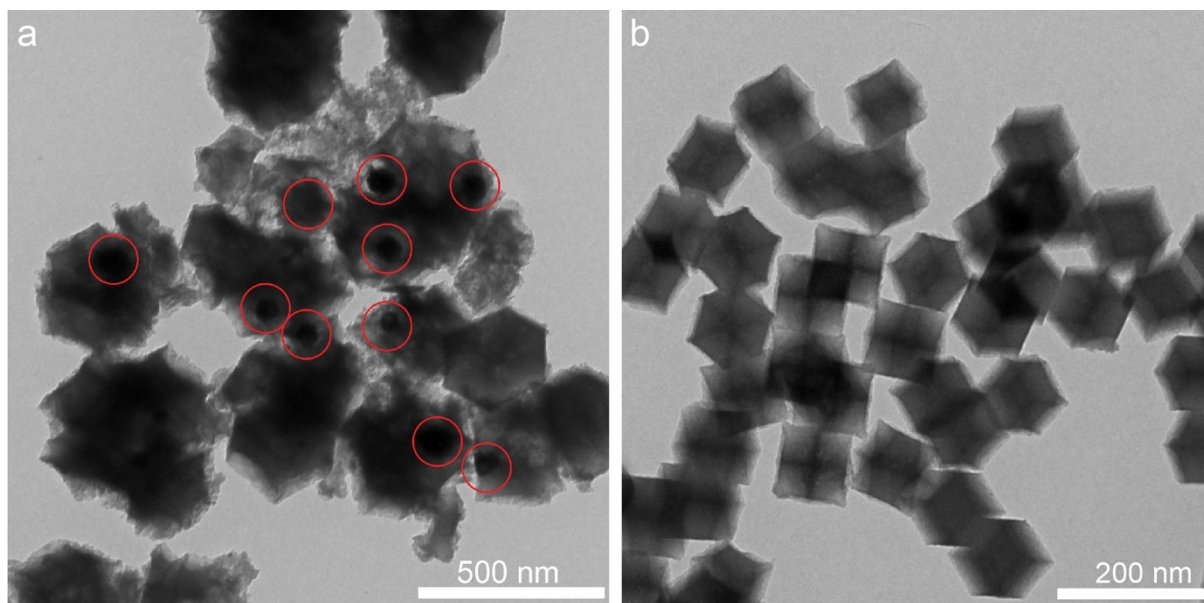

**Fig. S8** TEM image of the Co/N-C SACs synthesized with Co:Zn ratio of 0.75:1 (a) and 0.25:1 (b).
